# Supplementary material for: Antioxidant and pro-angiogenic effects of corilagin in rat cerebral ischemia via Nrf2 activation
Source: PubMed Central journal article supplement (PMC5777734; doi:10.18632/oncotarget.22023), 2017-10-24
Supplement: oncotarget-08-114816-s001.pdf [file oncotarget-08-114816-s001.pdf]

# Antioxidant and pro-angiogenic effects of corilagin in rat cerebral ischemia via Nrf2 activation

## SUPPLEMENTARY MATERIALS

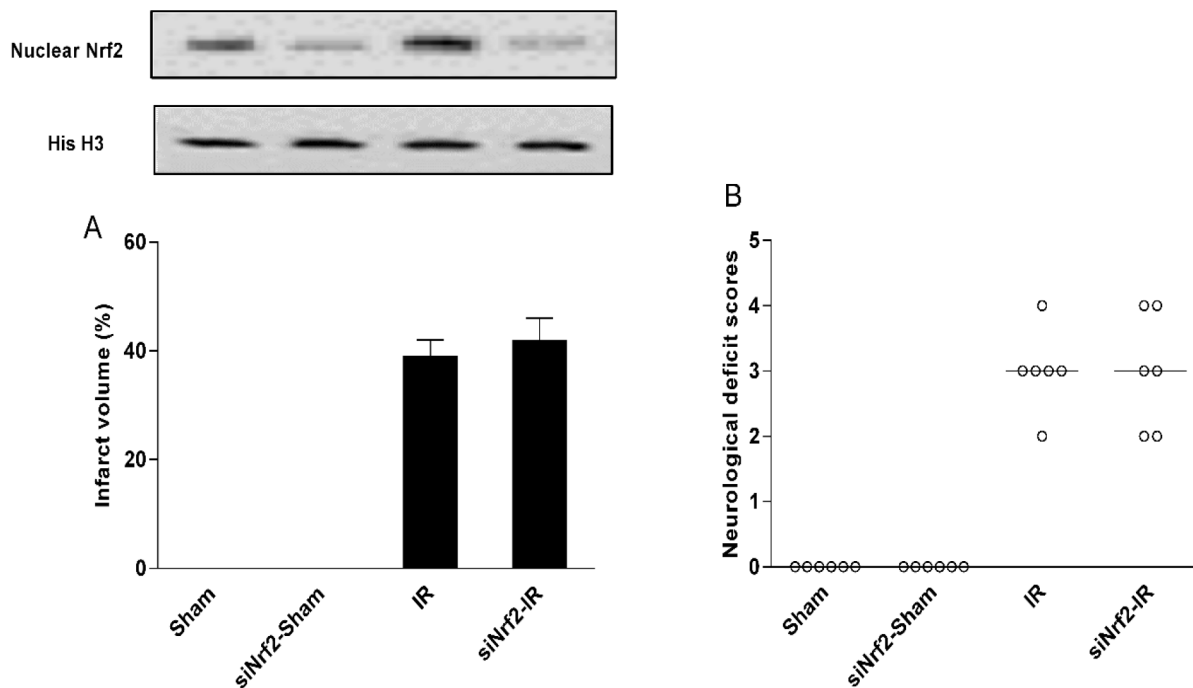

**Supplementary Figure 1: Transfection of siRNA has no significant effects on brain injury and improves neurological outcome in normal and MCAO rats.** Transfection efficiency was checked by Western analysis. (A) Quantitative analysis of infarct size and Nrf2 expression. Values are mean ± SD (n=5). (B) Neurological scores of animals in different groups. Data are presented as the median (range) (n = 5).

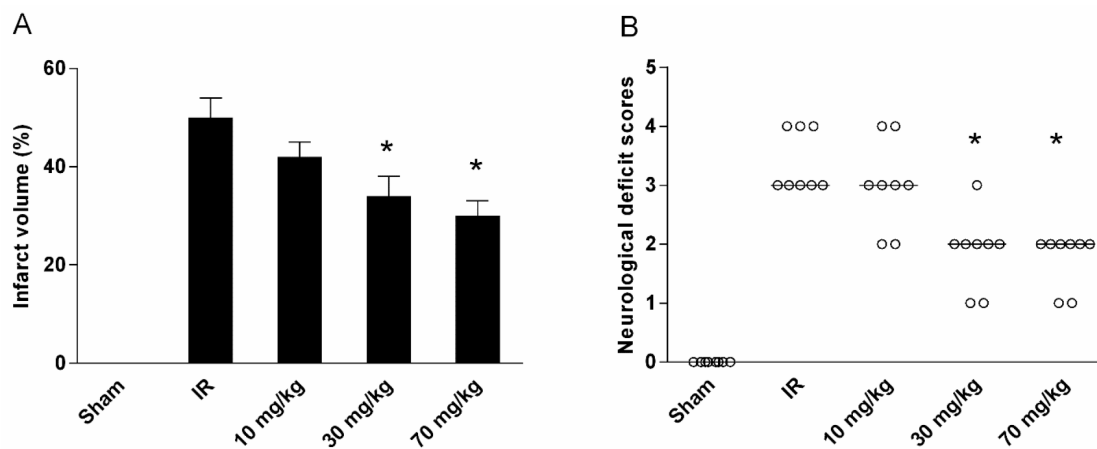

**Supplementary Figure 2: With the treatment of CL, infarct volume (A) and neurological outcome (B) was greatly improved in a dose-dependent manner as compared with the vehicle group. \*P<0.05 CL versus vehicle treated group. (n=5 animals for each group).**

Supplementary Table 1: Physiologic parameters, mean  $\pm$  SD (n=8)

|                          | MAP (mm Hg)     | pH               | PaCO <sub>2</sub> (mm Hg) | PaO <sub>2</sub> (mm Hg) | Glu (mg/dl)      |
|--------------------------|-----------------|------------------|---------------------------|--------------------------|------------------|
| Pre-ischemia             |                 |                  |                           |                          |                  |
| Sham                     | 121.3 $\pm$ 5.2 | 7.30 $\pm$ 0.12  | 40.4 $\pm$ 3.6            | 148.6 $\pm$ 12.2         | 143.3 $\pm$ 7.5  |
| IR                       | 120.6 $\pm$ 5.1 | 7.41 $\pm$ 0.17  | 41.6 $\pm$ 3.4            | 144.5 $\pm$ 13.5         | 133.5 $\pm$ 6.2  |
| IR-CL                    | 114.1 $\pm$ 6.4 | 7.33 $\pm$ 0.15  | 39.5 $\pm$ 3.7            | 147.5 $\pm$ 15.6         | 137.1 $\pm$ 8.7  |
| Si-CL                    | 121.6 $\pm$ 5.2 | 8.11 $\pm$ 0.24  | 42.6 $\pm$ 3.4            | 146.5 $\pm$ 13.5         | 138.5 $\pm$ 9.2  |
| Con-CL                   | 115.1 $\pm$ 6.1 | 8.33 $\pm$ 0.15  | 39.4 $\pm$ 3.1            | 141.5 $\pm$ 12.6         | 136.1 $\pm$ 7.2  |
| 15 min after reperfusion |                 |                  |                           |                          |                  |
| Sham                     | 107.8 $\pm$ 6.2 | 7.36 $\pm$ 0.13  | 39.4 $\pm$ 5.1            | 142.1 $\pm$ 14.4         | 142.1 $\pm$ 10.6 |
| IR                       | 110.5 $\pm$ 4.3 | 7.38 $\pm$ 0.16  | 39.1 $\pm$ 4.7            | 134.0 $\pm$ 12.8         | 145.5 $\pm$ 8.9  |
| IR-CL                    | 106.1 $\pm$ 5.3 | 7.40 $\pm$ 0.05  | 40.2 $\pm$ 2.5            | 132.7 $\pm$ 15.3         | 141.6 $\pm$ 8.7  |
| Si-CL                    | 105.5 $\pm$ 4.5 | 7.238 $\pm$ 0.16 | 36.1 $\pm$ 4.1            | 131.0 $\pm$ 12.8         | 143.1 $\pm$ 8.1  |
| Con-CL                   | 102.1 $\pm$ 5.1 | 8.40 $\pm$ 0.07  | 38.2 $\pm$ 3.5            | 132.7 $\pm$ 15.3         | 141.6 $\pm$ 8.6  |
| 60 min after reperfusion |                 |                  |                           |                          |                  |
| Sham                     | 107.8 $\pm$ 5.6 | 7.41 $\pm$ 0.29  | 38.2 $\pm$ 3.9            | 140.0 $\pm$ 16.4         | 142.9 $\pm$ 8.3  |
| IR                       | 101.3 $\pm$ 3.2 | 7.39 $\pm$ 0.34  | 37.4 $\pm$ 3.1            | 132.5 $\pm$ 11.2         | 148.6 $\pm$ 6.5  |
| IR-CL                    | 103.8 $\pm$ 7.6 | 7.41 $\pm$ 0.26  | 38.2 $\pm$ 3.9            | 130.0 $\pm$ 16.4         | 139.9 $\pm$ 7.1  |
| Si-CL                    | 103.5 $\pm$ 4.2 | 7.39 $\pm$ 0.14  | 33.4 $\pm$ 5.1            | 122.5 $\pm$ 11.2         | 147.6 $\pm$ 4.5  |
| Con-CL                   | 102.3 $\pm$ 4.5 | 7.29 $\pm$ 0.35  | 32.4 $\pm$ 5.1            | 126.5 $\pm$ 12.1         | 148.6 $\pm$ 6.4  |

MAP, Mean arterial blood pressure; PaO<sub>2</sub>, arterial oxygen tension; PaCO<sub>2</sub>, arterial carbon dioxide tension; Glu, blood glucose.
